# Supplementary material for: Wastewater treatment bacteria show differential preference for colonizing natural biopolymers
Source: Springer Nature journal article supplement (doi:10.1007/s00253-024-13162-x), 2024-05-06
Supplement: MOESM1 [file 253_2024_13162_MOESM1_ESM.pdf]

## **Supplementary information**

### **Applied Microbiology and Biotechnology**

**Title: Wastewater treatment bacteria show differential preference for colonizing natural biopolymers**

Zongzong Liu<sup>a</sup>, Onder Kimyon<sup>b</sup>, Mike Manefield<sup>b</sup> \*

<sup>a</sup>School of Chemical Engineering, University of New South Wales (UNSW), Sydney, 2052, Australia.

<sup>b</sup>School of Civil and Environmental Engineering, University of New South Wales (UNSW), Sydney, 2052, Australia.

\*Corresponding author: Mike Manefield

School of Civil and Environmental Engineering,

University of New South Wales (UNSW)

Sydney, 2052, Australia.

Email: [manefield@unsw.edu.au](mailto:manefield@unsw.edu.au)

Phone +61405477066

## Supplementary Figure S1

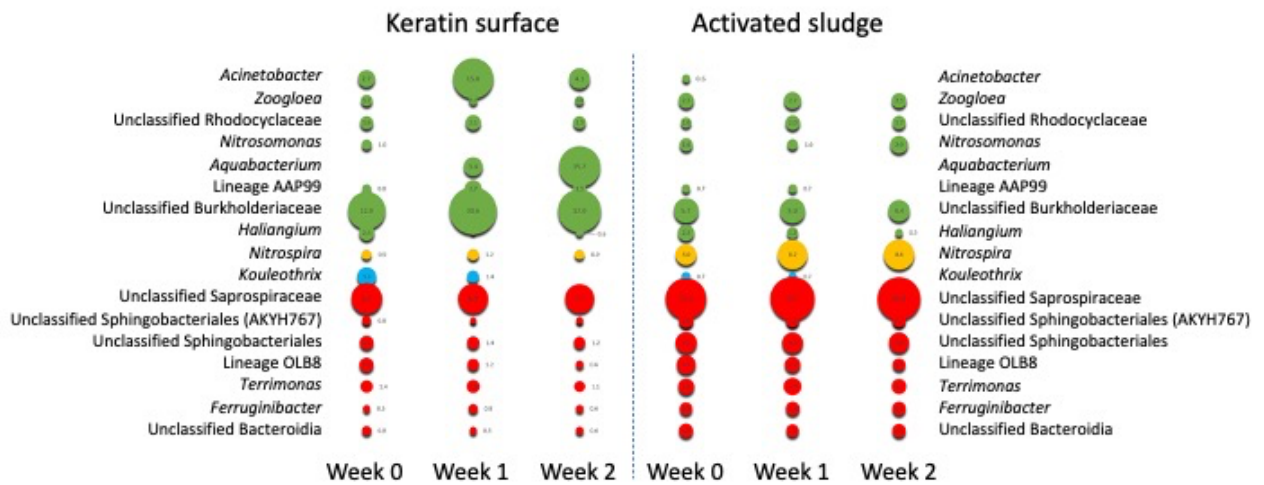

**Figure S1.** Bacterial lineages colonising keratin in activated sludge without nutrient amendment over two weeks based on Illumina sequencing of 16S rRNA gene (showing lineages with >0.1% relative abundance). Bubble sizes and figures represent the relative abundance (%) of bacterial lineages and different colors resemble the phylum to which bacterial lineage belongs. An *Aquabacterium* and an unclassified *Burkholderiaceae* lineage dominated colonization of keratin.
